# Supplementary material
Source: PubMed Central journal article supplement (PMC4221538)
Supplement: NIHMS634873-supplement-125_2014_3382_MOESM1_ESM.pdf [file NIHMS634873-supplement-125_2014_3382_MOESM1_ESM.pdf]

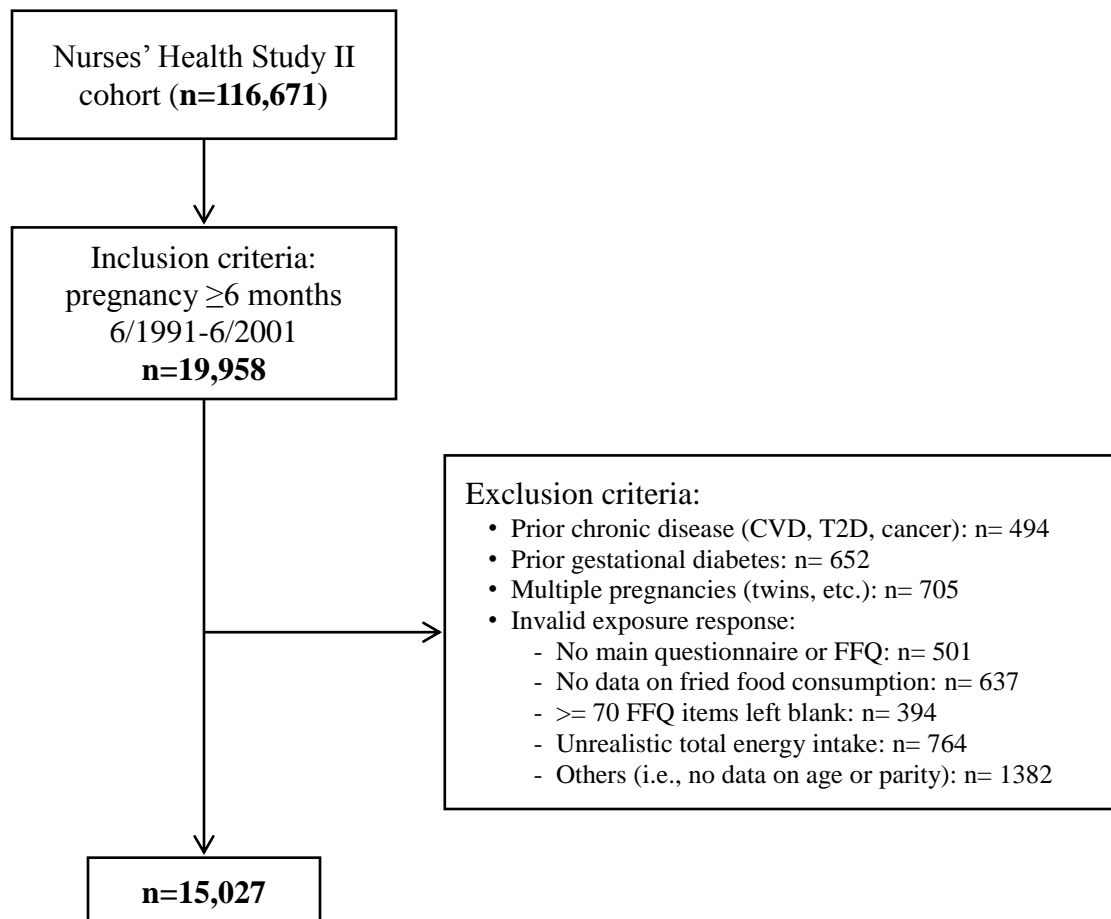

**ESM Fig. 1. The flowchart of participants.**

Exclusion criteria are not mutually exclusive and individual reasons may not total the number of excluded participants.

Abbreviations: CVD, cardiovascular disease; FFQ, food frequency questionnaire; T2D, type 2 diabetes.
