# Supplementary material
Source: PubMed Central journal article supplement (PMC4221538)

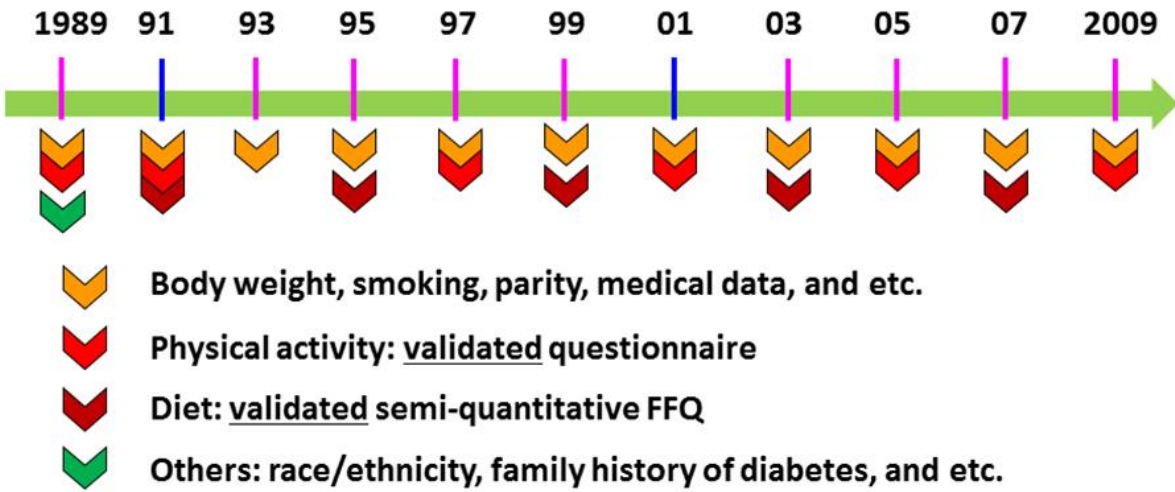

ESM Fig. 2. Timing of data collection in the Nurses' Health Study II cohort.

Supplement: NIHMS634873-supplement-125_2014_3382_MOESM2_ESM.pdf [file NIHMS634873-supplement-125_2014_3382_MOESM2_ESM.pdf]
